# Supplementary material
Source: MDPI journal article supplement (https://www.mdpi.com/2071-1050/13/16/8817)
Supplement: s1 [file s1]

## Supplementary Materials

# Remediation of emerging heavy metals from water using natural adsorbent: Adsorption performance and mechanistic insights

Mehak Nawaz Khan<sup>a,\*</sup>, Hidayat Ullah<sup>b</sup>, Sundas Naeem<sup>b</sup>, Jalal Uddin<sup>c,\*</sup>, Yasir Hamid<sup>d</sup>,  
Waqar Ahmad<sup>e</sup>, Jia Ding<sup>f</sup>

<sup>a</sup> State Key Laboratory of Advanced Special Steel, School of Materials Science and Engineering, International Joint Laboratory of Catalytic Chemistry, Research Center of Nano Science and Technology, College of Sciences, Department of Chemistry, Shanghai University, Shanghai 200444, China.

<sup>b</sup> Institute of Chemical Sciences, Gomal University, Dera Ismail Khan 29220, Khyber Pakhtunkhwa, Pakistan.

<sup>c</sup> Department of Pharmaceutical Chemistry, College of Pharmacy, King Khalid University, Abha 62529, Saudi Arabia.

<sup>d</sup> Ministry of Education (MOE) Key Lab of Environ. Remediation and Ecol. Health, College of Environmental and Resources Science, Zhejiang University, Hangzhou 310058, China.

<sup>e</sup> Department of Computer Science, Federal Urdu University, Islamabad, Pakistan.

*<sup>f</sup> School of Chemical and Biomolecular Engineering, The University of Sydney, New South Wales, 2006, Australia.*

\*Corresponding authors: mehaknawazkhan1@gmail.com, jalaluddinamin@gmail.com

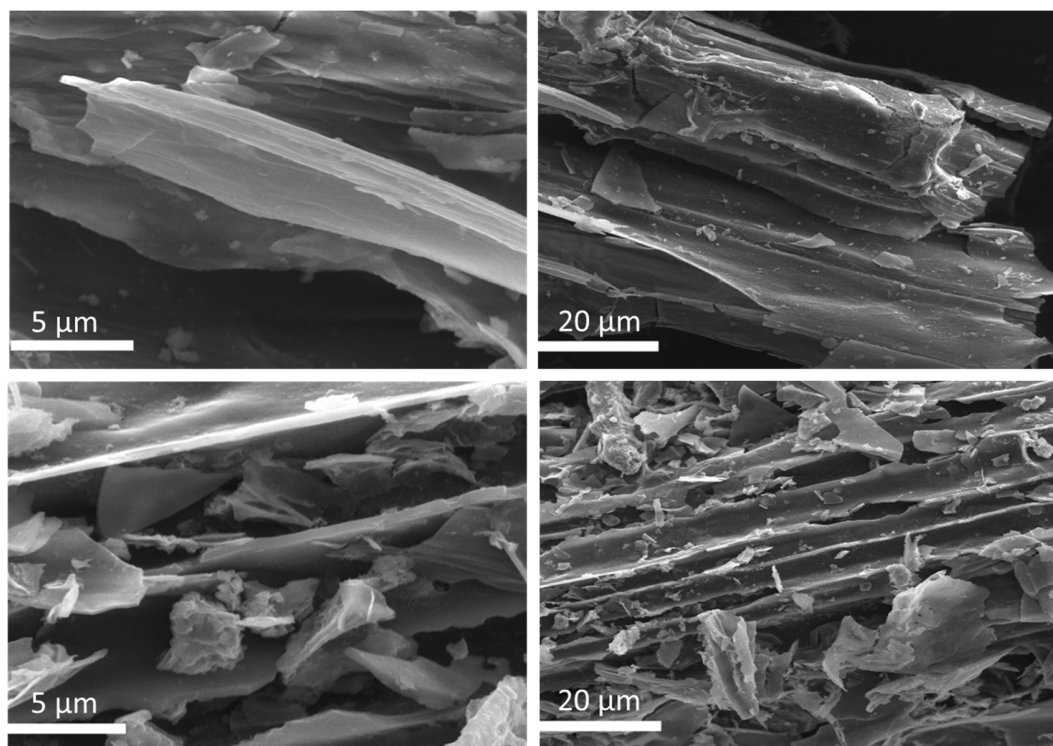

**Figure S1.** Scanning electron micrographs (SEM) of pristine WSB and pre-adsorbed AWSB (pyrolyzed at 673 K).

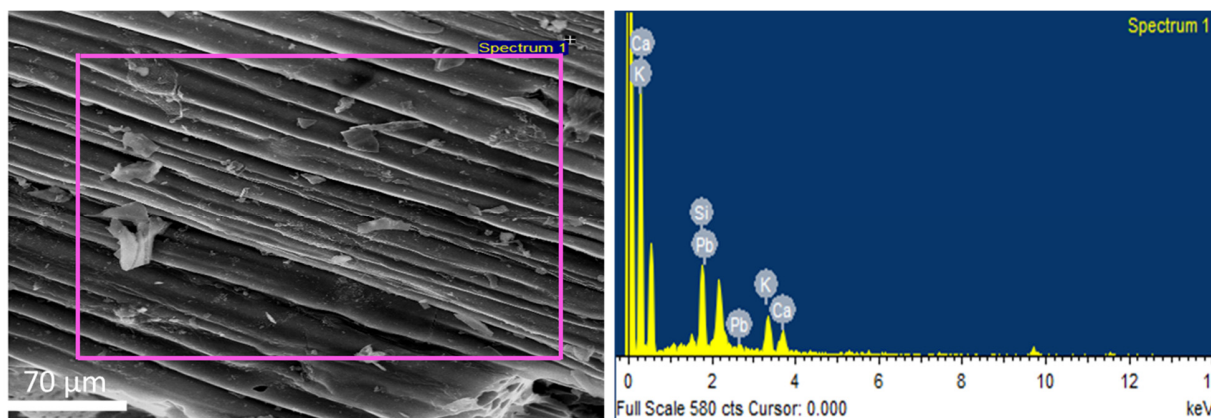

**Figure S2.** EDX mapping of the pristine WSB.

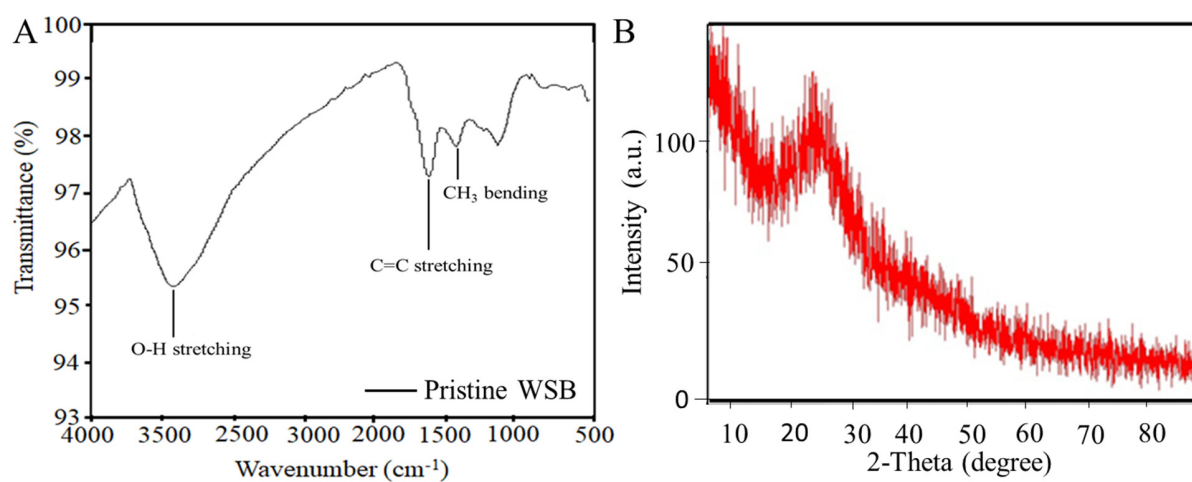

**Figure S3.** (A) FTIR spectra and (B) XRD pattern of the pristine WSB.

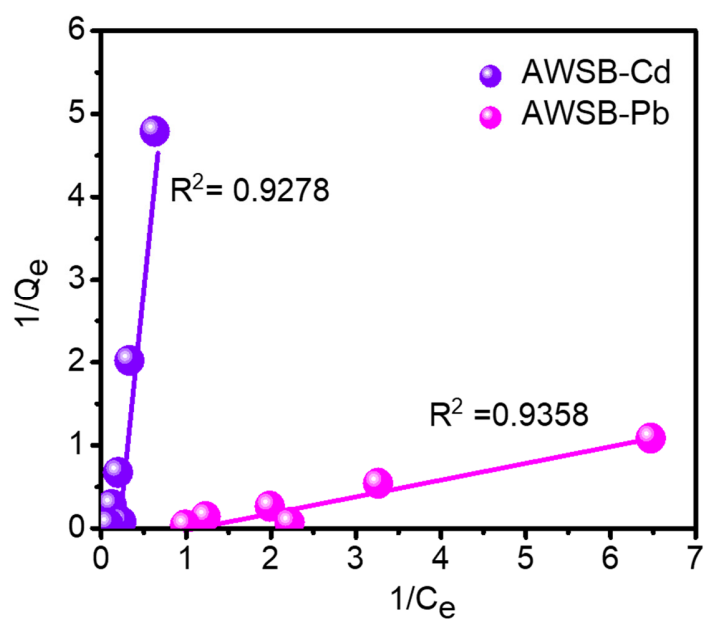

**Figure S4.** Langmuir isotherm for the adsorption of Cd (II) and Pb (II) AWSB at 310K.

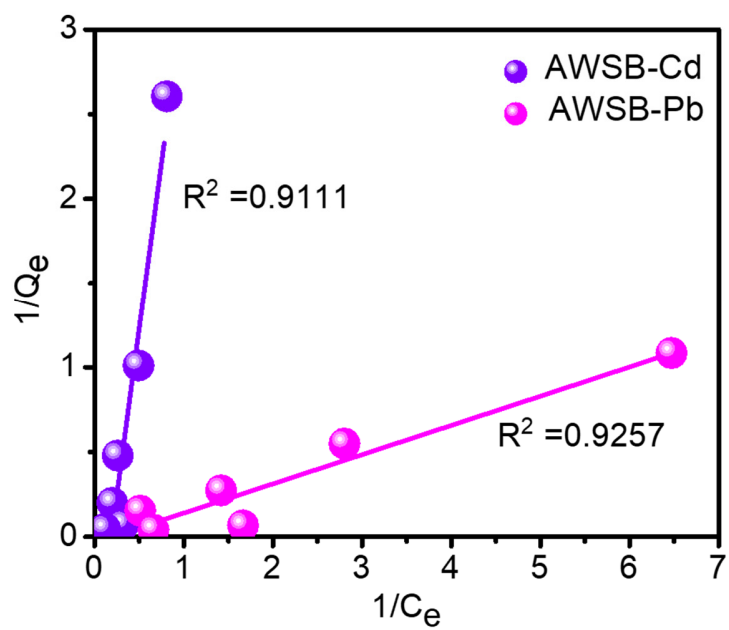

**Figure S5.** Langmuir isotherm for the adsorption of Cd (II) and Pb (II) on AWSB at 322K.

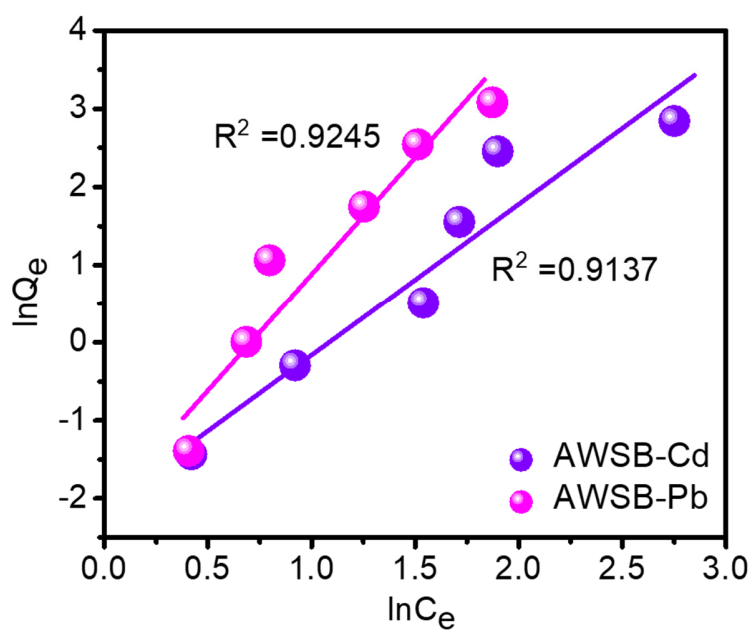

**Figure S6.** Freundlich isotherm for the adsorption of Cd (II) and Pb (II) on AWSB at 310K.

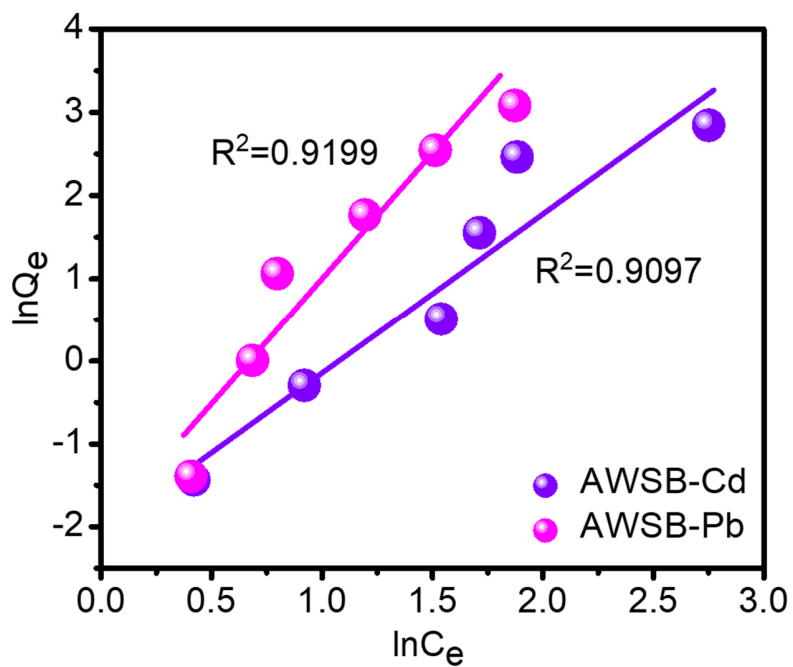

**Figure S7.** Freundlich isotherm for the adsorption of Cd (II) and Pb (II) on AWSB at 322K.

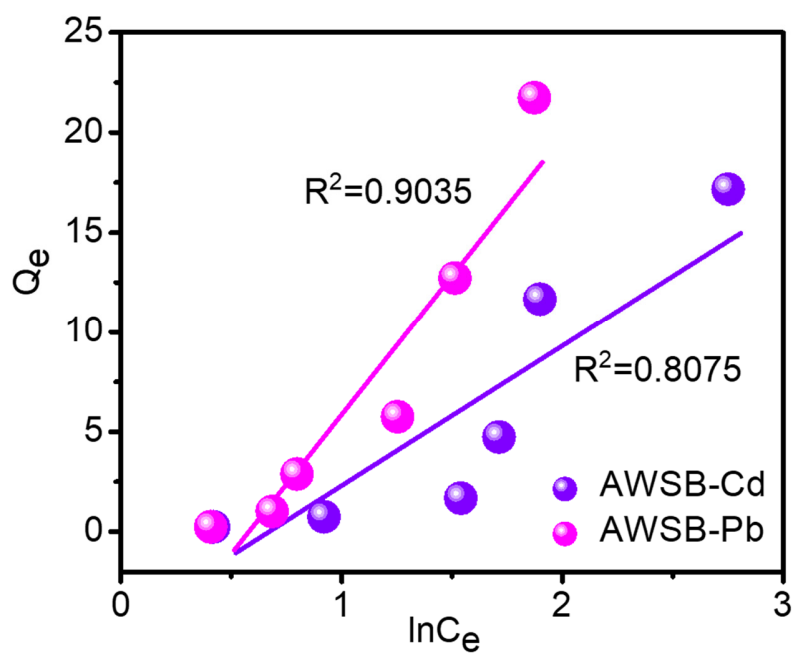

**Figure S8.** Temkin isotherm for the adsorption of Cd (II) and Pb (II) on AWSB at 310K.

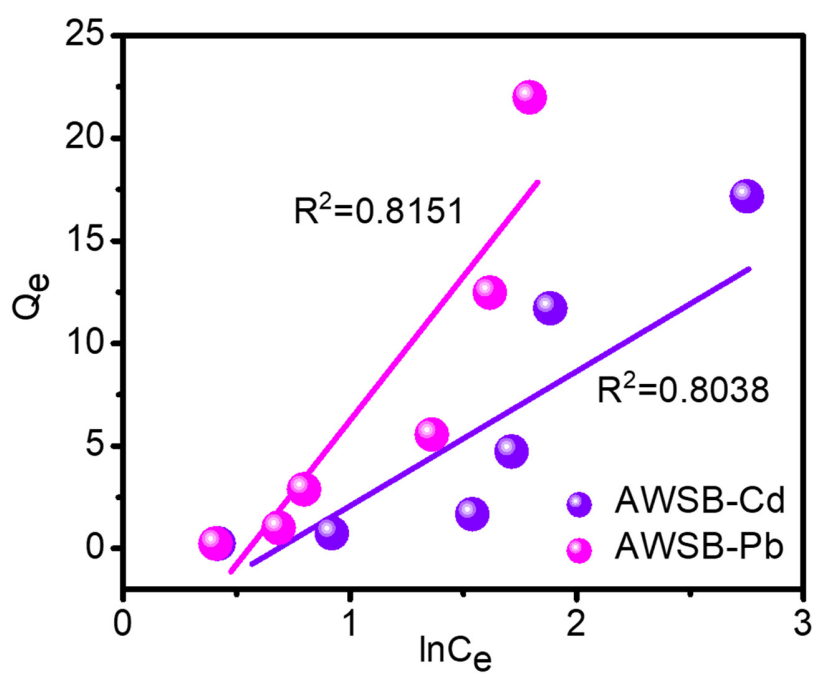

**Figure S9.** Temkin isotherm for the adsorption of Cd (II) and Pb (II) on AWSB at 322K.

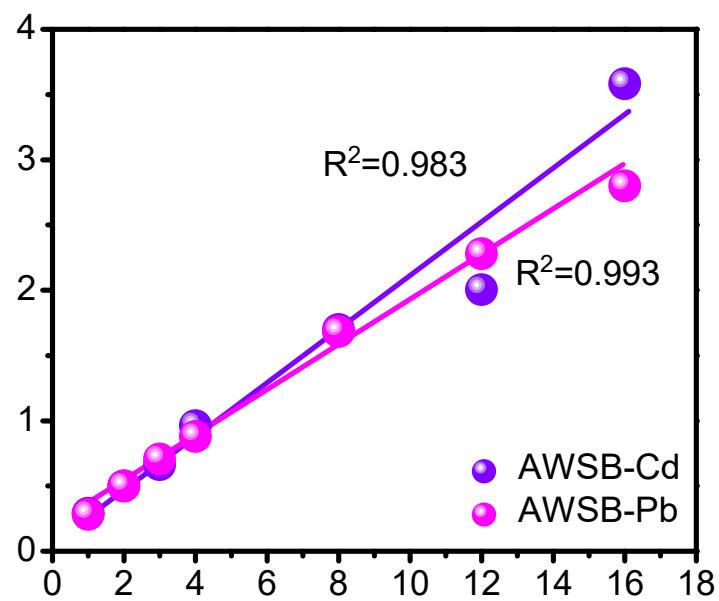

**Figure S10.** Pseudo 1<sup>st</sup> order fittings of Cd and Pb adsorption data.

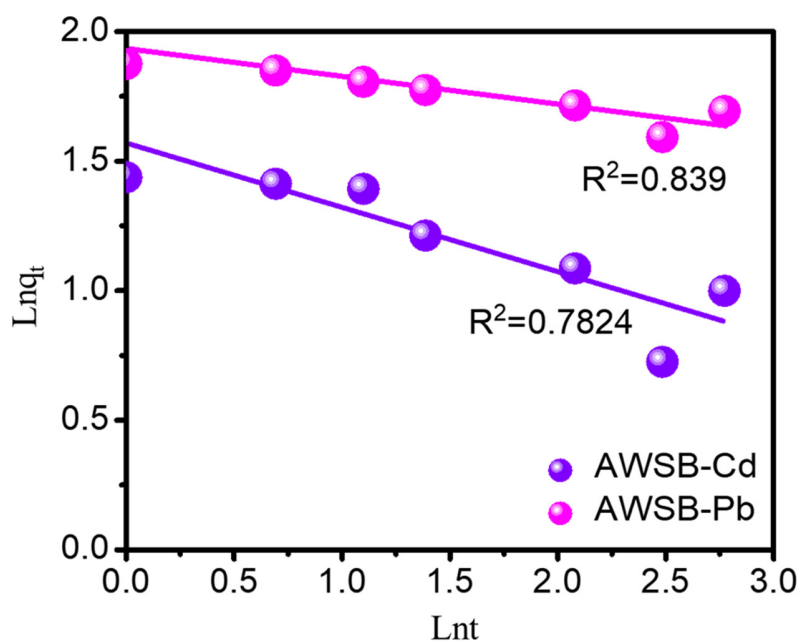

**Figure S11.** Power function fittings of Cd (II) and Pb (II) adsorption data for AWSB.

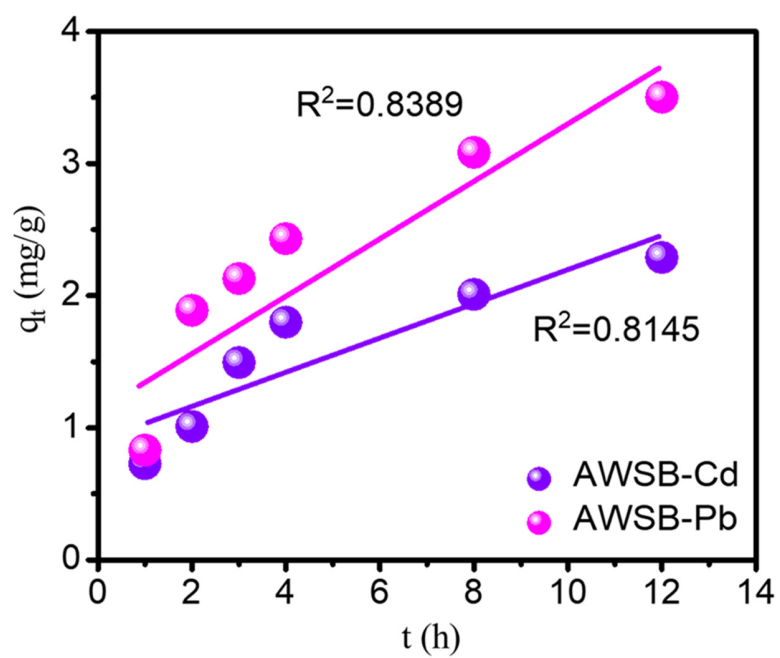

**Figure S12.** Intraparticle diffusion fittings of Cd (II) and Pb (II) adsorption data for AWSB.
